# Supplementary material for: Modulation of the microstructure and electrical properties of LaAlO 3 ceramics induced by doping with rare earth elements (Eu, Gd, Ho, and Tm)
Source: Royal Society of Chemistry journal article supplement (doi:10.1039/d4tc04091k), 2024-12-24
Supplement: d4tc04091k1.pdf [file d4tc04091k1.pdf]

**Modulation of the microstructure and electrical properties of LaAlO<sub>3</sub> ceramics  
induced by doping with rare earth elements (Eu, Gd, Ho, and Tm)**

Kai Ding<sup>a,b</sup>, Wenye Deng<sup>c</sup>, Jinyang Li<sup>a,b</sup>, Ni Ai<sup>a,d</sup>, Yan Xue<sup>a</sup>, Xianghui Chen<sup>e</sup>, Pengjun  
Zhao<sup>a</sup>, Weiwei Meng<sup>a</sup>, Aimin Chang<sup>a</sup>, Yongxin Xie<sup>a</sup>,✉

<sup>a</sup>State Key Laboratory of Functional Materials and Devices for Special Environments  
Conditions, Xinjiang Key Laboratory of Electronic Information Materials and  
Devices, Xinjiang Technical Institute of Physics and Chemistry of CAS, Urumqi,  
830011, China

<sup>b</sup>School of Materials Science and Engineering, Xinjiang University, Urumqi, 830046,  
China

<sup>c</sup>School of Chemical and Environmental Engineering, Xinjiang Institute of  
Engineering, Xinjiang, 830023, China

<sup>d</sup>State Key Laboratory of Chemistry and Utilization of Carbon-based Energy  
Resources; College of Chemistry, Xinjiang University, Urumqi, 830017, Xinjiang, PR  
China.

<sup>e</sup>Chongqing Material Research Institute Co, Ltd.

✉ Corresponding author.

E-mail address: xieyx@ms.xjb.ac.cn

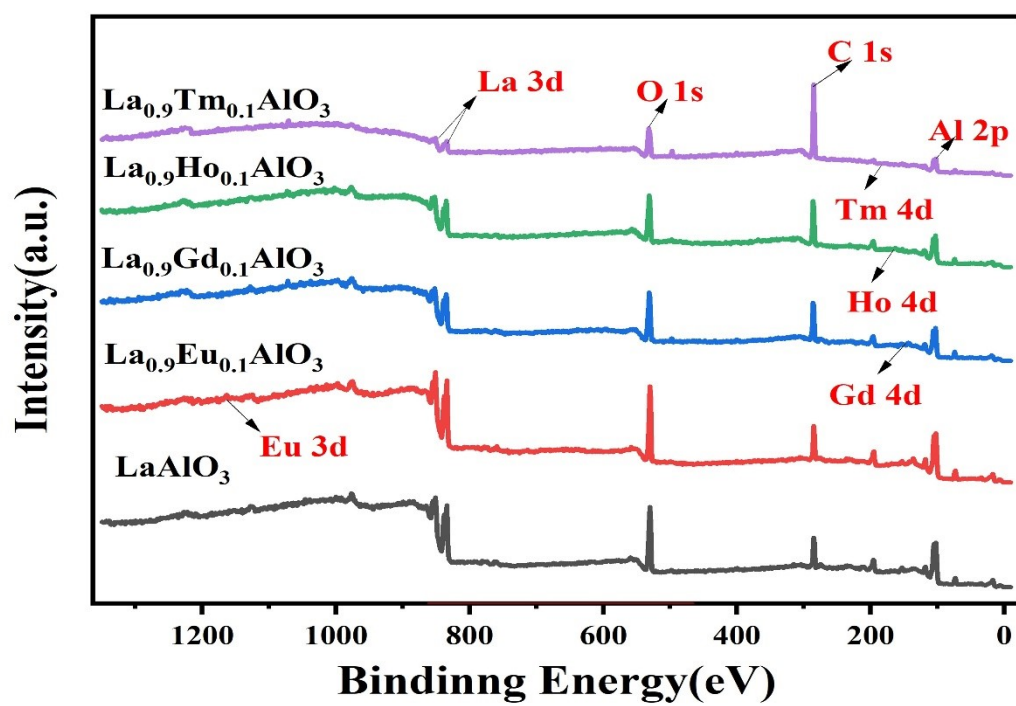

Figure S1. XPS full spectra

Table 1. Cell parameters of the  $\text{La}_{0.9}\text{X}_{0.1}\text{AlO}_3$  (X = Eu, Gd, Ho, Tm) and  $\text{LaAlO}_3$  ceramics

|                                              | Lattice constants<br>(Å) | Lattice constants<br>(Å) | Cell volume<br>(Å <sup>3</sup> ) |
|----------------------------------------------|--------------------------|--------------------------|----------------------------------|
| $\text{LaAlO}_3$                             | $a = b = 5.34739$        | $c = 13.04416$           | 323.02                           |
| $\text{La}_{0.9}\text{Eu}_{0.1}\text{AlO}_3$ | $a = b = 5.33692$        | $c = 13.03766$           | 321.6                            |
| $\text{La}_{0.9}\text{Gd}_{0.1}\text{AlO}_3$ | $a = b = 5.33495$        | $c = 13.02154$           | 320.96                           |
| $\text{La}_{0.9}\text{Ho}_{0.1}\text{AlO}_3$ | $a = b = 5.33686$        | $c = 13.02857$           | 321.37                           |
| $\text{La}_{0.9}\text{Tm}_{0.1}\text{AlO}_3$ | $a = b = 5.37488$        | $c = 13.03974$           | 326.24                           |

Table 2. Cell refinement factors obtained by Rietveld refinement  $\text{La}_{0.9}\text{X}_{0.1}\text{AlO}_3$  and

$\text{LaAlO}_3$  samples.

| Refinement factors | $\text{LaAlO}_3$ | $\text{La}_{0.9}\text{Eu}_{0.1}\text{AlO}_3$ | $\text{La}_{0.9}\text{Gd}_{0.1}\text{AlO}_3$ | $\text{La}_{0.9}\text{Ho}_{0.1}\text{AlO}_3$ | $\text{La}_{0.9}\text{Tm}_{0.1}\text{AlO}_3$ |
|--------------------|------------------|----------------------------------------------|----------------------------------------------|----------------------------------------------|----------------------------------------------|
| Rp (%)             | 6.16             | 6.61                                         | 5.41                                         | 6.58                                         | 7.91                                         |
| Rwp(%)             | 9.317            | 8.569                                        | 8.282                                        | 8.572                                        | 9.564                                        |
| $\chi^2$ (%)       | 2.48             | 2.48                                         | 2.32                                         | 2.57                                         | 2.81                                         |

Table 3. Binding energy and vacancy oxygen concentration of lattice oxygen (O lattice) and vacancy oxygen (O vacancy) in  $\text{La}_{0.9}\text{X}_{0.1}\text{AlO}_3$  (X=Eu, Gd, Ho, Tm) and

| LaAlO <sub>3</sub> ceramics                          |                        |                       |                            |
|------------------------------------------------------|------------------------|-----------------------|----------------------------|
|                                                      | O 1s O lattice<br>(eV) | O1s O vacancy<br>(eV) | O vacancy<br>concentration |
| LaAlO <sub>3</sub>                                   | 529.79                 | 531.98                | 0.3578                     |
| La <sub>0.9</sub> Eu <sub>0.1</sub> AlO <sub>3</sub> | 529.59                 | 531.50                | 0.3895                     |
| La <sub>0.9</sub> Gd <sub>0.1</sub> AlO <sub>3</sub> | 529.90                 | 532.04                | 0.3038                     |
| La <sub>0.9</sub> Ho <sub>0.1</sub> AlO <sub>3</sub> | 529.67                 | 531.77                | 0.4154                     |
| La <sub>0.9</sub> Tm <sub>0.1</sub> AlO <sub>3</sub> | 529.62                 | 531.64                | 0.7243                     |

## Computational details

The calculations of density functional theory are done with the projector augmented plane-wave basis, which is implemented in Vienna ab-initio simulation package. And the plane-waves are cut-off at 550 eV. The exchange-correlations of electrons are described by the generalized gradient approximations with the form proposed by Perdew, Burke, and Ernzerhof. To improve the descriptions on the correlation interactions, the Hubbard U scheme is employed with  $U_{\text{eff}} = 5.0$  eV applied on the f-shell of Eu, Gd, Ho and Tm. The energy converge criterion for solving self-consistent Kohn-Sham equations is  $10^{-6}$  eV. The Brillouin zone is sampled with resolution of  $0.03 \text{ \AA}^{-1}$ , using the scheme of Monkhorst-Pack. All the structures in this study are fully relaxed until the Hellman-Feynman smaller than  $0.05 \text{ eV/\AA}$ .<sup>1-5</sup>

## References

1. G. Kresse and D. Joubert, *Phys. Rev. B.*, 1999, **59**, 1758.
2. J. P. Perdew, K. Burke and M. Ernzerhof, *Phys. Rev. Lett.*, 1996, **77**, 3865.
3. C. Franchini, R. Kováčik, M. Marsman, S. S. Murthy, J. He, C. Ederer and G. Kresse, *J. Phys. Condens. Matter.*, 2012, **24**, 235602.
4. H. J. Monkhorst and J. D. Pack, *Phys. Rev. B.*, 1976, **13**, 5188.
5. V. I. Anisimov, J. Zaanen and O. K. Andersen, *Phys. Rev. B.*, 1991, **44**, 943.
